# Supplementary material for: CycleFlow simultaneously quantifies cell-cycle phase lengths and quiescence in vivo
Source: PubMed Central journal article supplement — Cell Rep Methods. 2022 Oct 6;2(10):100315. doi: 10.1016/j.crmeth.2022.100315 (PMC9606136; doi:10.1016/j.crmeth.2022.100315), 2022-10-06
Supplement: mmc1.pdf [file mmc1.pdf]

**Cell Reports Methods, Volume 2**

**Supplemental information**

**CycleFlow simultaneously quantifies  
cell-cycle phase lengths and quiescence *in vivo***

**Adrien Jolly, Ann-Kathrin Fanti, Csilla Kongsaysak-Lengyel, Nina Claudino, Ines Gräßer, Nils B. Becker, and Thomas Höfer**

| Challenge                                               | Addressed by                                                                              |
|---------------------------------------------------------|-------------------------------------------------------------------------------------------|
| Cells labeled at any stage of S phase.                  | Subphases track progress within cycle phases.                                             |
| Variable cycle progression speed.                       | Distributions for phase durations.                                                        |
| Ambiguity between G <sub>0</sub> and G <sub>1</sub> .   | Model states are unambiguous cycle phases, not gates.                                     |
| EdU is consumed gradually.                              | Decrease in labeling efficiency is fitted from data.                                      |
| DNA content reflects cycle phase with limited accuracy. | Cells at boundaries of DNA staining gates assigned to cycle phases via model fit to data. |

**Table S1 | Model features introduced to address the main challenges in the interpretation of thymidine analog labeling, Related to STAR Methods.**

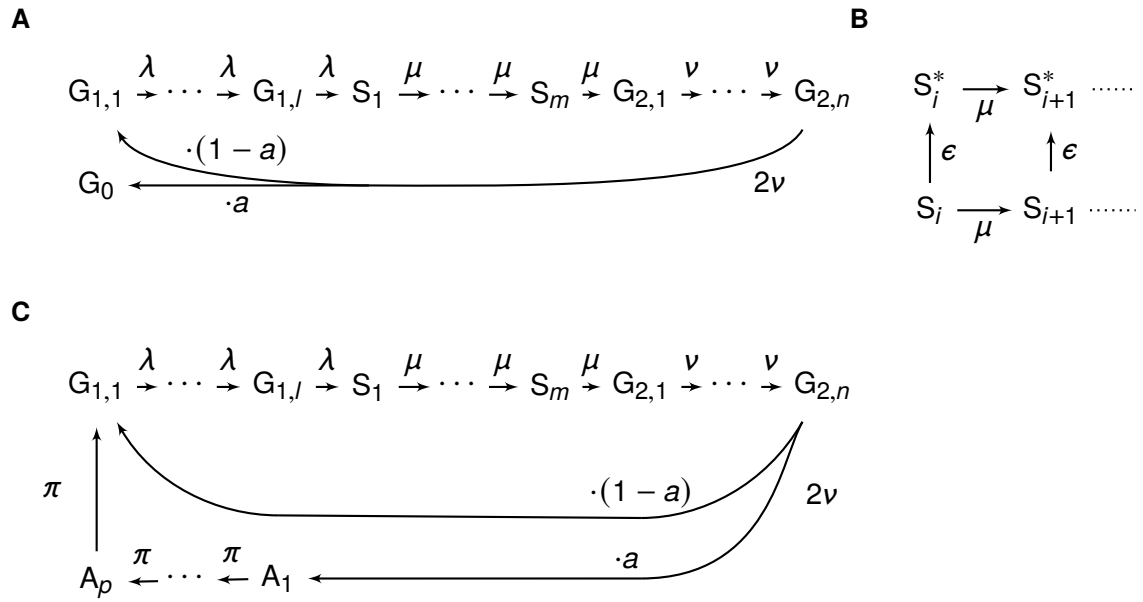

**Figure S1 | Dynamical models, Related to STAR Methods.** **A** Cells progress through the subphases of  $g_1$ , S and  $G_2$  phase. The average and variability of the time to complete each cycle phase is governed by the progression rate and substep number. At the end of the cycle, cells divide. With probability  $a$ , daughter cells arrest and enter state  $G_0$ ; otherwise they continue the cycle. From any cycle state, cell may be lost at rate  $\delta$  (not shown). **B** Cells in subphase  $S_i$  can acquire the label to end up in state  $S_i^*$  and transition to the next subphase. **C** Extended cell cycle model, not used in CycleFlow. Upon division, cells enter arrest with probability  $a$ . The arrested phase A is subdivided into subphases  $A_1, \dots, A_p$ , after which cells return into the cycle at  $G_{1,1}$ . The remaining transitions are as in **A**.

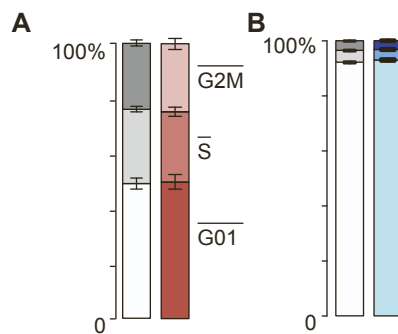

**Figure S2 | Measured and inferred steady-state cell-cycle fractions based on DNA content, Related to Figure 2.** **A** TET21N, experimental data averaged over all time points (left diagram, error bars indicate standard error of the mean) vs Model fit (right diagram, error bars indicate 90% credible interval) **B** same as **A** for DP thymocytes

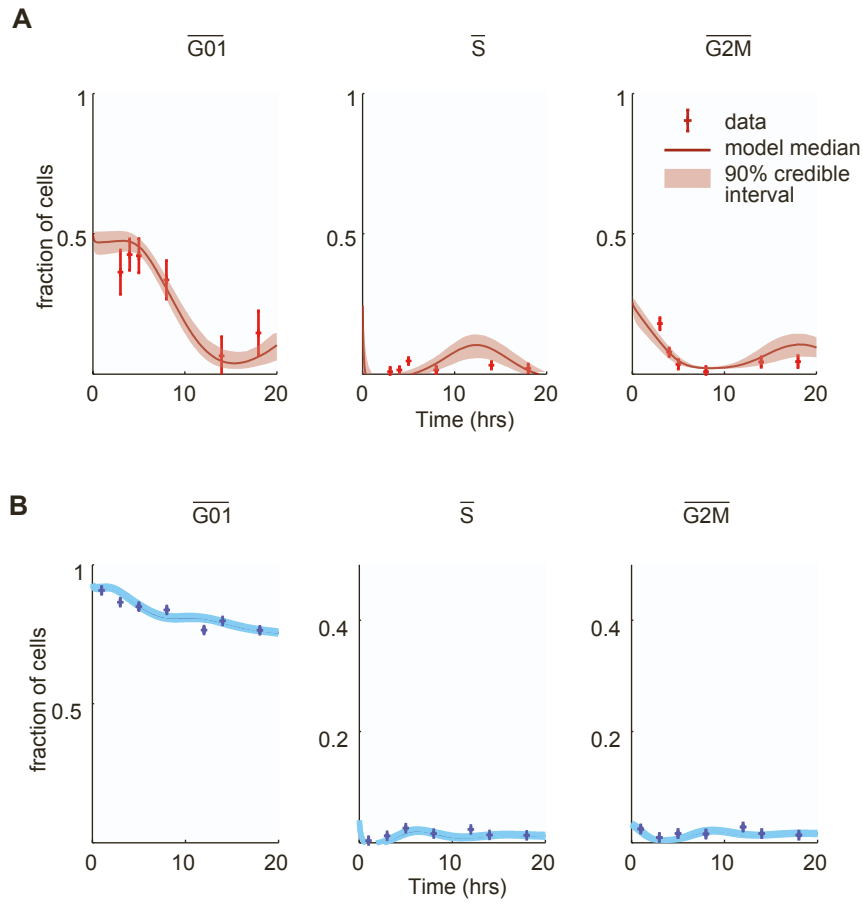

**Figure S3| Time courses of EdU-unlabeled cells in  $\overline{G01}$ ,  $\overline{S}$ , and  $\overline{G2M}$  gates compared between experimental data and model prediction, Related to Figure 2. **A** TET21N and **B** DP cells (error bars, pooled SEM; n = 3 to 6 per time point) and model fit. Population sizes are given as fractions of total cells.**

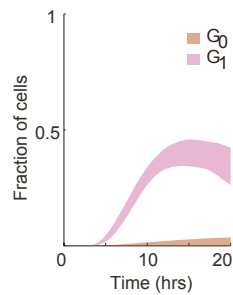

**Figure S4| Inferred time course of EdU-labeled  $G_0$  and  $G_1$  TET21N cells in the  $\overline{G01}$  gate, Related to Figure 2. Population sizes are given as fractions of total cells.**

| Parameter    | Description                              | Unit     | Prior range |
|--------------|------------------------------------------|----------|-------------|
| $\lambda$    | $g_1$ subphase progress rate             | $h^{-1}$ | [0.01, 6]   |
| $\mu$        | S subphase progress rate                 | $h^{-1}$ | [1, 5]      |
| $\nu$        | $G_2$ subphase progress rate             | $h^{-1}$ | [1, 10]     |
| $a$          | Cycle arrest probability                 |          | [0, 1]      |
| $\tau_E$     | EdU degradation time                     | h        | [0.5, 5]    |
| $\epsilon_0$ | initial labeling rate                    | $h^{-1}$ | [1, 15]     |
| $l$          | $g_1$ subphase number                    |          | [2, 30]     |
| $m$          | S subphase number                        |          | 15, fixed   |
| $n$          | $G_2$ subphase number                    |          | 15, fixed   |
| $m_{01}^-$   | S subphases assigned to $\overline{G01}$ |          | [0, 5]      |
| $m_2^-$      | S subphases assigned to $\overline{G2M}$ |          | [0, 5]      |

**Table S2 | Model parameters with allowed ranges, Related to STAR Methods.**

| Parameter    | Description                              | Unit     | TET21N              | DP                |
|--------------|------------------------------------------|----------|---------------------|-------------------|
| $\lambda$    | $g_1$ subphase progress rate             | $h^{-1}$ | 3.6(1.7, 4.9)       | 0.49(0.4, 0.6)    |
| $\mu$        | S subphase progress rate                 | $h^{-1}$ | 2.3(1.8, 2.9)       | 3.7(3.1, 4.2)     |
| $\nu$        | $G_2$ subphase progress rate             | $h^{-1}$ | 2.8(2.6, 3.2)       | 7.5(6.9, 8.8)     |
| $a$          | Cycle arrest probability                 |          | 0.016(0.002, 0.046) | 0.42(0.415, 0.43) |
| $\tau_E$     | EdU degradation time                     | h        | 2.6(2, 4)           | 1(0.8, 1.3)       |
| $\epsilon_0$ | initial labeling rate                    | $h^{-1}$ | 8.6(3, 14.3)        | 5(2.2, 14)        |
| $l$          | $g_1$ subphase number                    |          | 24(11, 30)          | 2(2, 2)           |
| $m_{01}^-$   | S subphases assigned to $\overline{G01}$ |          | 2(0, 3)             | 4(3, 5)           |
| $m_2^-$      | S subphases assigned to $\overline{G2M}$ |          | 1(0, 3)             | 0(0, 1)           |
| $l/\lambda$  | $g_1$ duration                           | h        | 6.6(5.5, 7.9)       | 4(3.3, 4.9)       |
| $m/\mu$      | S duration                               | h        | 6.4(5.2, 8.2)       | 4(3.5, 4.8)       |
| $n/\nu$      | $G_2$ duration                           | h        | 5.3(4.6, 5.8)       | 2(1.7, 2.1)       |
| $2a$         | $G_0$ fraction                           |          | 0.03(0, 0.09)       | 0.84(0.83, 0.86)  |

**Table S3 | Model parameters medians and 90% credible intervals, Related to STAR Methods.**
